# Supplementary material for: Metal–insulator–semiconductor field-effect transistors (MISFETs) using p-type SnS and nanometer-thick Al2S3 layers
Source: Royal Society of Chemistry journal article supplement (doi:10.1039/c7ra00041c), 2017-01-01
Supplement: c7ra00041c1.pdf [file c7ra00041c1.pdf]

### Supporting Information

#### **Metal-Insulator-Semiconductor Field-Effect Transistors (MISFETs) Using p-type SnS and Nanometer-thick Al<sub>2</sub>S<sub>3</sub> Layer**

M. Devika<sup>1,2,#</sup>, N. Koteeswara Reddy<sup>3,4,#</sup>, Sreekantha Reddy Dugasani<sup>4,#</sup>, K. Ramesh<sup>5</sup>, K. R. Gunasekhar<sup>6</sup>, E. S. R. Gopal<sup>5</sup>, and Sung Ha Park<sup>4\*</sup>

<sup>1</sup>Department of Aerospace Engineering, Indian Institute of Science, Bangalore 560012, India

<sup>2</sup>School of Advanced Materials Science & Engineering, Sungkyunkwan University,  
Suwon, Gyeonggi-do, 16419, South Korea

<sup>3</sup>Center for Nanoscience and Engineering, Indian Institute of Science, Bangalore 560012,  
India

<sup>4</sup>Department of Physics and Sungkyunkwan Advanced Institute of Nanotechnology (SAINT),  
Sungkyunkwan University, Suwon 16419, South Korea

<sup>5</sup>Department of Physics, Indian Institute of Science, Bangalore 560012, India

<sup>6</sup>Department of Instrumentation and Applied Physics, Indian Institute of Science, Bangalore  
560012, India

**SI-1a:** Morphology studies of SnS structures on Al coated and bare glass substrates and SnS thickness over Al layers:

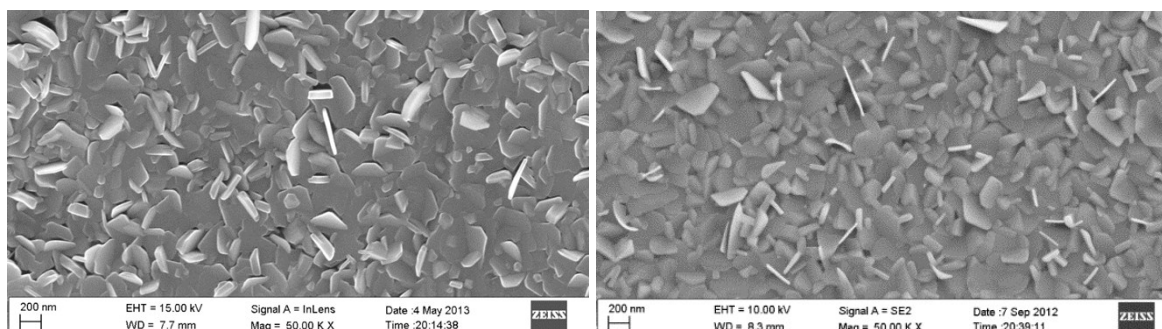

**Fig. SI-1a:** FESEM images of SnS structures on Al coated and bare glass substrates.

### SI-1b: Surface properties SnS structures on different surfaces by profilometer studies

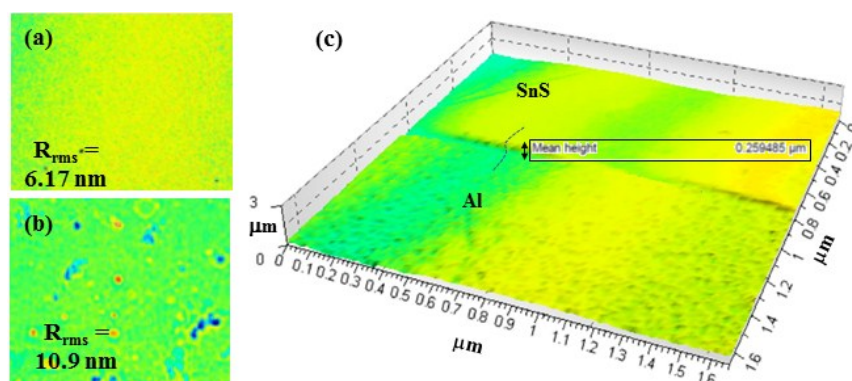

**Fig. SI-1b:** (a & b) Surface roughness of SnS nanostructures over Al coated and bare glass substrates and (c) thickness of SnS over Al coated glass substrate

### SI-2: Chemical composition of SnS structures on Al coated and bare glass substrates:

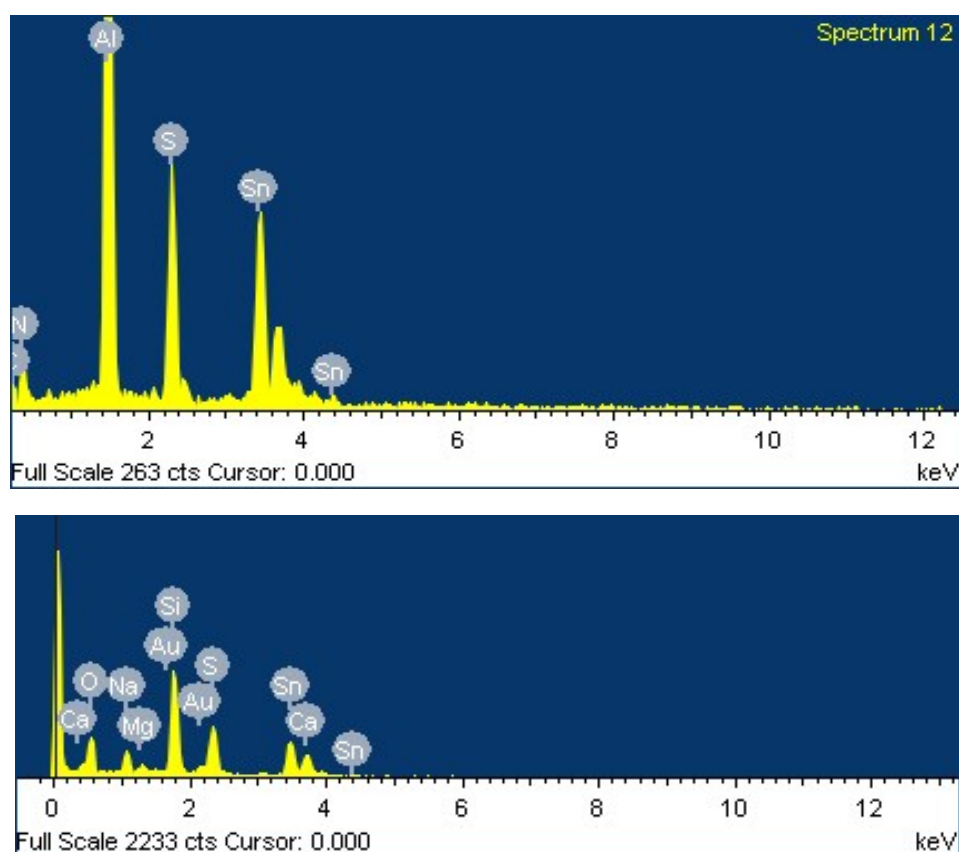

**Fig. SI-2:** EDS spectra of SnS structures on Al coated and bare glass substrates:

**SI-3:** Structural studies of SnS structures on bare glass substrate (y-axis is in log scale) and Al coated glass substrates:

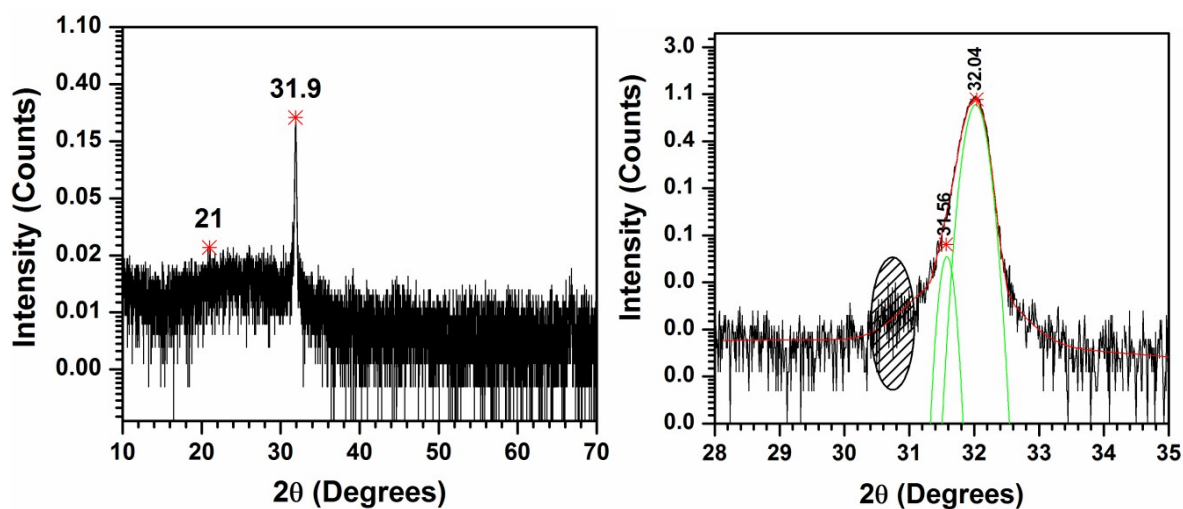

**Fig. SI-3:** XRD spectrum of SnS structures grown on bare glass and elaborated XRD spectrum of SnS structures grown on Al coated glass substrates

**SI-4:** Crystalline characteristics of SnS structures grown on bare and Al coated glass substrates.

**Table 1:** Data from XRD spectrum of SnS structures on glass substrate

| Nr. | Pos. [°2Th.] | Intensity [cts] | FWHM [°2Th.] | d-Spacing [Å] |          | Rel. Int. [%] |
|-----|--------------|-----------------|--------------|---------------|----------|---------------|
|     |              |                 |              | Observed      | Standard |               |
| 1   | 31.90        | 200.83          | 0.1968       | 2.805         | 2.797    | 100.00        |

**Table 2:** Data from multi-peak Gaussian curve fit of elaborated XRD spectrum of SnS structures on Al coated glass substrates

| Peak | Area   | Center (2θ°) | Width (FWHM, 2θ°) | Height (counts) |
|------|--------|--------------|-------------------|-----------------|
| 1    | 10.72  | 31.577       | 0.18835           | 45.395          |
| 2    | 348.96 | 32.023       | 0.28179           | 988.07          |
